# Supplementary material for: Cryptic genomic lesions in adverse-risk acute myeloid leukemia identified by integrated whole genome and transcriptome sequencing
Source: PubMed Central journal article supplement (PMC7214252; doi:10.1038/s41375-019-0546-1), 2019-08-21
Supplement: 41375_2019_546_MOESM1_ESM.pdf [file 41375_2019_546_MOESM1_ESM.pdf]

## **SUPPLEMENTARY INFORMATION**

### **CRYPTIC GENOMIC LESIONS IN ADVERSE-RISK ACUTE MYELOID LEUKEMIA IDENTIFIED BY INTEGRATED WHOLE GENOME AND TRANSCRIPTOME SEQUENCING**

Jaeseung C. Kim<sup>1,2,3</sup>, Philip C. Zuzarte<sup>2</sup>, Tracy Murphy<sup>3</sup>, Michelle Chan-Seng-Yue<sup>3,4</sup>, Andrew M. K. Brown<sup>2</sup>, Paul M. Krzyzanowski<sup>2</sup>, Adam C. Smith<sup>5</sup>, Faiyaz Notta<sup>1,3,4</sup>, Mark D. Minden<sup>1,3</sup>, and John D. McPherson<sup>1,2,6</sup>

<sup>1</sup>Department of Medical Biophysics, Faculty of Medicine, University of Toronto, Toronto, ON, Canada;

<sup>2</sup>Genomics Technology Program, Ontario Institute for Cancer Research, Toronto, ON, Canada;

<sup>3</sup>Princess Margaret Cancer Centre, University Health Network, Toronto, ON, Canada;

<sup>4</sup>PanCuRx Translational Research Initiative, Ontario Institute for Cancer Research, Toronto, ON, Canada;

<sup>5</sup>Department of Laboratory Medicine and Pathobiology, University of Toronto and the Laboratory Medicine Program, University Health Network, Toronto, ON, Canada;

<sup>6</sup>Biochemistry and Molecular Medicine, University of California, Davis, Sacramento, CA, USA

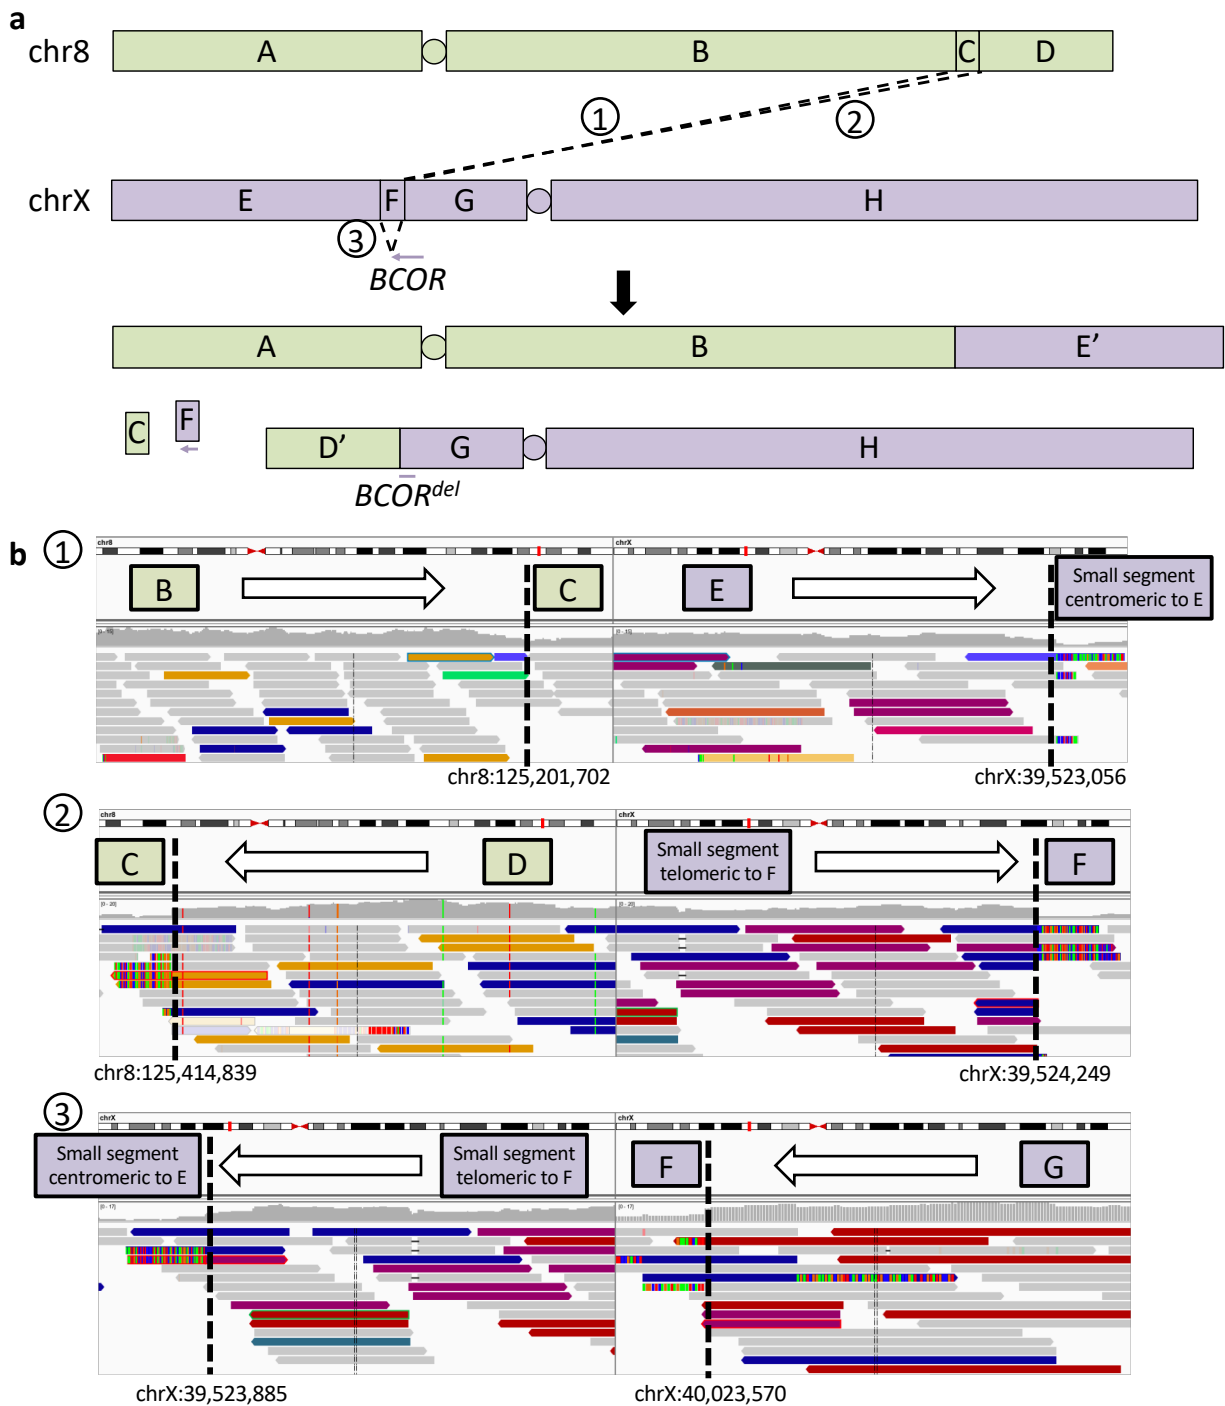

**Supplementary Figure 1.** Three SVs involved in t(X;8) and *BCOR* deletion in case 2. **a** Schematic representation of SVs as in Fig. 1 b, f. **b** Integrative Genomics Viewer (IGV) visualization of sequencing reads involved in each SVs. Boxes represent genomic segments, dashed lines represent breakpoints, and arrows represent directions of discordant Illumina paired-end reads. Orientations of rearranged genomic segments in **a** are inferred by re-orienting read pairs to point towards each other.

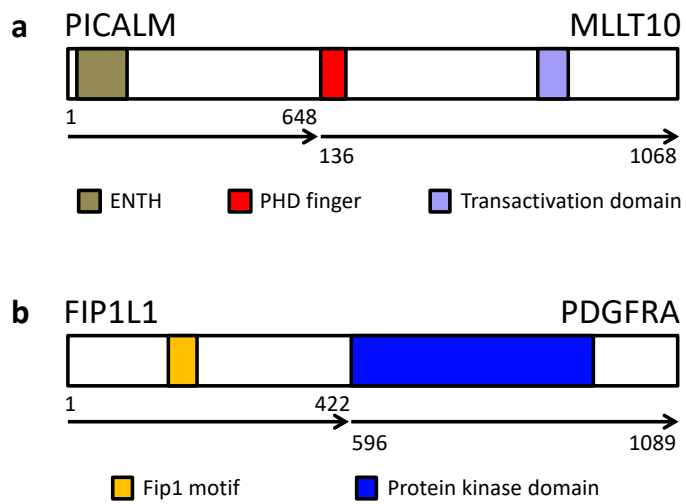

**Supplementary Figure 2.** Domain structures of **a** PICALM-MLLT10 and **b** FIP1L1-PDGFRA fusion proteins from case 5. See Fig. 1d, h for legends.

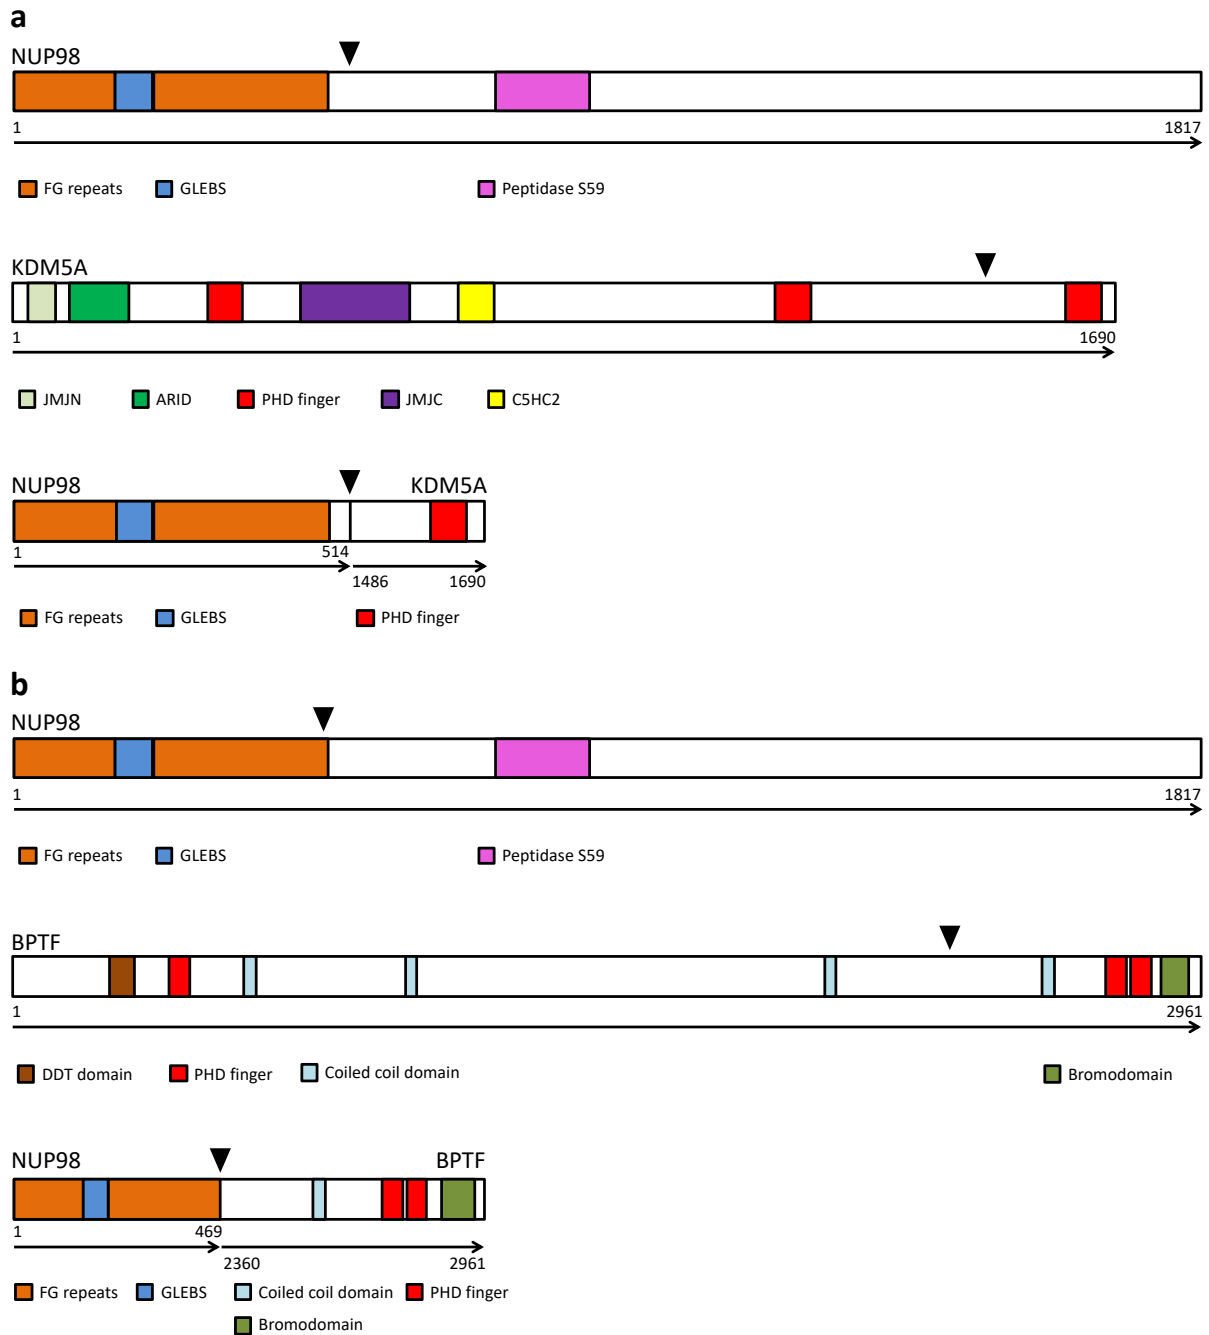

**Supplementary Figure 3.** Domain structures of proteins involved in **a** NUP98-KDM5A and **b** NUP98-BPTF fusions. Triangles represent fusion junctions. See Fig. 1d, h for legends.

**Supplementary Table 1.** Clinical data and additional summary of genomic findings from nine patients with adverse-risk AML

| Case | Gender | Age | UHN Biobank ID | Diagnosis                   | Induction therapy | Primary refractory (Yes/No)             | WGS coverage | # of chromosomal gains/losses |                | # of sub-chromosomal gains/losses |                | # of translocations/inversions |                |
|------|--------|-----|----------------|-----------------------------|-------------------|-----------------------------------------|--------------|-------------------------------|----------------|-----------------------------------|----------------|--------------------------------|----------------|
|      |        |     |                |                             |                   |                                         |              | Total                         | NGS concordant | Total                             | NGS concordant | Total                          | NGS concordant |
| 1    | M      | 55  | 0187           | Secondary AML following MDS | 3+7               | No; died due to sepsis during induction | 15.5         | 4                             | 4              | 0                                 | 0              | 1                              | 1              |
| 2    | F      | 54  | 0619           | AML (T/myeloid phenotype)   | 3+7               | Yes                                     | 10.5         | 1                             | 1              | 0                                 | 0              | 1                              | 1              |
| 3    | M      | 64  | 5726           | AML                         | 3+7 + lovostatin  | Yes                                     | 14.9         | 7                             | 2              | 20                                | 6              | 4                              | 1              |
| 4    | F      | 42  | 8213           | AML                         | 3+7               | No; died due to ICH during induction    | 10.1         | 3                             | 3              | 0                                 | 0              | 3                              | 2              |
| 5    | M      | 33  | 8423           | AML                         | 3+7               | Yes                                     | 9.6          | 0                             | 0              | 2                                 | 1              | 2                              | 2              |
| 6    | F      | 20  | 8886           | AML                         | 3+7               | Yes                                     | 11.6         | 1                             | 1              | 1                                 | 1              | 1                              | 1              |
| 7    | M      | 46  | 080110         | APL-like                    | 3+7               | Yes                                     | 11.2         | 6                             | 3              | 0                                 | 0              | 2                              | 2              |
| 8    | F      | 64  | 522222         | AML                         | 3+7               | Yes                                     | 6.5          | 6                             | 1              | 4                                 | 2              | 4                              | 3              |
| 9    | F      | 70  | 130053         | AML                         | 3+7               | Yes                                     | 11.9         | 0                             | 0              | 0                                 | 0              | 1                              | 1              |

  

|                  | Chromosomal gains/losses | Sub-chromosomal gains/losses | Translocations/inversions |
|------------------|--------------------------|------------------------------|---------------------------|
| Concordance rate | 53.6%                    | 37.0%                        | 73.7%                     |

**Supplementary Table 2.** List of bioinformatics tools used in this study and their references

| Algorithm   | Version | Purpose                           | Reference                                                                                                                                                                                                                                                                   |
|-------------|---------|-----------------------------------|-----------------------------------------------------------------------------------------------------------------------------------------------------------------------------------------------------------------------------------------------------------------------------|
| BWA         | 0.7.4   | Whole-genome sequencing alignment | Li H, Durbin R. Fast and accurate short read alignment with Burrows-Wheeler transform. <i>Bioinformatics</i> 2009; 25: 1754–1760.                                                                                                                                           |
| CREST       | 1.0     | Structural variant detection      | Wang J, Mullighan CG, Easton J, Roberts S, Heatley SL, Ma J et al. CREST maps somatic structural variation in cancer genomes with base-pair resolution. <i>Nat Methods</i> 2011; 8: 652–654.                                                                                |
| HMMcopy     | 0.1.1   | Copy number analysis              | Ha G, Roth A, Lai D, Bashashati A, Ding J, Goya R et al. Integrative analysis of genome-wide loss of heterozygosity and monoallelic expression at nucleotide resolution reveals disrupted pathways in triple-negative breast cancer. <i>Genome Res</i> 2012; 22: 1995–2007. |
| STAR        | 2.5.2a  | RNA-seq alignment                 | Dobin A, Davis CA, Schlesinger F, Drenkow J, Zaleski C, Jha S et al. STAR: ultrafast universal RNA-seq aligner. <i>Bioinformatics</i> 2013; 29: 15–21.                                                                                                                      |
| STAR-Fusion | 1.0.0   | Fusion transcript detection       | Haas B, Dobin A, Stransky N, Li B, Yang X, Tickle T et al. STAR-Fusion: Fast and Accurate Fusion Transcript Detection from RNA-Seq. <i>bioRxiv</i> (Preprint) 2017. doi:10.1101/120295.                                                                                     |
| GATK        | 3.6.0   | SNV and indel calling             | Poplin R, Ruano-Rubio V, DePristo MA, Fennell TJ, Carneiro MO, Van der Auwera GA et al. Scaling accurate genetic variant discovery to tens of thousands of samples. <i>bioRxiv</i> (Preprint) 2018. doi:10.1101/201178.                                                     |
| IGV         | 2.3.88  | Visualization of sequencing data  | Thorvaldsdottir H, Robinson JT, Mesirov JP. Integrative Genomics Viewer (IGV): high-performance genomics data visualization and exploration. <i>Briefings in Bioinformatics</i> 2013; 14: 178–192.                                                                          |

**Supplementary Table 3. Individual cytogenetic abnormalities and concordant NGS findings**

| Case | Karyotype<br>(NGS concordant abnormalities listed underneath)                                                                                                                                                                                                                                                                                                                                                                                                                                                                                                                                                   | NGS findings                                |                                                                                                                                                                                                                            |                                                                                                                  |
|------|-----------------------------------------------------------------------------------------------------------------------------------------------------------------------------------------------------------------------------------------------------------------------------------------------------------------------------------------------------------------------------------------------------------------------------------------------------------------------------------------------------------------------------------------------------------------------------------------------------------------|---------------------------------------------|----------------------------------------------------------------------------------------------------------------------------------------------------------------------------------------------------------------------------|------------------------------------------------------------------------------------------------------------------|
|      |                                                                                                                                                                                                                                                                                                                                                                                                                                                                                                                                                                                                                 | Copy number gain                            | Copy number loss                                                                                                                                                                                                           | Chromosomal rearrangement                                                                                        |
| 1    | 51, XY, +Y, +der(1;7)(q10;p10), +6, +8, +10 [10]<br><br>+Y<br><br>+der(1;7)(q10;p10)<br><br>+6<br><br>+8<br><br>+10                                                                                                                                                                                                                                                                                                                                                                                                                                                                                             | Y<br><br>1q, 7p<br><br>6<br><br>8<br><br>10 |                                                                                                                                                                                                                            |                                                                                                                  |
| 2    | 45, XX, -7 [17] / 45, X, t(X;8)(p21.2;q24.1), -7 [2] / 46, XX[1]<br><br>-7<br><br>t(X;8)(p21.2;q24.1)                                                                                                                                                                                                                                                                                                                                                                                                                                                                                                           |                                             | 7<br><br>BCOR                                                                                                                                                                                                              | t(X;8)(p11.4;q24.13) linked to BCOR deletion                                                                     |
| 3    | 43~45, X, -Y, t(1;5)(q21;p13), t(1;6)(q21;p25), -2, add(2)(p21), add(3)(q27), del(3)(q27), add(4)(p16), del(4)(q33), del(5)(q31), add(6)(p25), del(6)(q21), -7, add(7)(q36), del(7)(q22), -8, add(8)(q24.3), del(8)(q23), +del(8)(q22), add(9)(p22), add(9)(q34), add(11)(p15), add(12)(p13), -16, add(16)(p13.3), -17, der(17)t(11;17)(q13;p13), add(18)(q23), der(19)t(11;19)(q13;q13.3), -21, add(22)(p11.2), +4mar [cp20]<br><br>-Y<br><br>add(2)(p21)<br><br>add(3)(q27)<br><br>del(3)(q27)<br><br><br><br>del(7)(q22)<br><br>add(8)(q24.3)<br><br>add(12)(p13)<br><br>-17<br><br>der(17)t(11;17)(q13;p13) |                                             | Yq11.221-q12<br><br>2p21-p11.2 (BCL11A)<br><br>3q26.32-q29<br><br><br><br><br>7q21.3-q36.2<br><br>8q12.1-q23.1 (RUNX1T1)<br><br>12p13.33-p13.2<br><br>17p13.3-p12 (TP53),<br>17q11.2-q24.3 (NF1)<br><br>11q13.4-q25 (ETS1) | chr2/3/8/11/12/16/<br>17/19/X rearrangements<br><br><br><br><br><br>chr2/3/8/11/12/16/<br>17/19/X rearrangements |
| 4    | 48-49, XX, +6, +8, +9, t(12;17)(p13;q11.2), i(17)(q10), inv(18)(q11.2q21) [cp20]<br><br>+6<br><br>+8<br><br>+9<br><br>t(12;17)(p13;q11.2)<br><br>inv(18)(q11.2q21)                                                                                                                                                                                                                                                                                                                                                                                                                                              | 6<br><br>8<br><br>9                         |                                                                                                                                                                                                                            | t(11;12;17)(p15.4;p13.3;q11.2) linked to gene fusion<br><br>18q21.2 (SMAD4)                                      |
| 5    | 46, XY, del(6)(q21q23), t(10;11)(p1?2;q21), inv(12)(q15q24.1), del(15)(q2?4) [cp19] / 46, XY [1]<br><br>del(6)(q21q23)<br><br>t(10;11)(p1?2;q21)<br><br>inv(12)(q15q24.1)                                                                                                                                                                                                                                                                                                                                                                                                                                       |                                             | 6q16.1-q22.31 (FOXO3)                                                                                                                                                                                                      | t(10;11)(p12.3;q14.2) linked to gene fusion<br><br>chr12 rearrangements linked to SH2B3 and TBX3 deletions       |
| 6    | 46, XX, del(5)(q31), t(11;12)(p13;p13) [4] / 45, idem, -13 [5] / 46, XX [1]<br><br>del(5)(q31)<br><br>t(11;12)(p13;p13)<br><br>-13                                                                                                                                                                                                                                                                                                                                                                                                                                                                              |                                             | 5q22.2q32 (APC)<br><br>13                                                                                                                                                                                                  | chr11/12/17 rearrangements linked to CNVs and gene fusion (Figure 1)                                             |

| Case | Karyotype<br>(NGS concordant abnormalities listed underneath)                                                                                                                                                                                                                     | NGS findings     |                    |                                                                                               |
|------|-----------------------------------------------------------------------------------------------------------------------------------------------------------------------------------------------------------------------------------------------------------------------------------|------------------|--------------------|-----------------------------------------------------------------------------------------------|
|      |                                                                                                                                                                                                                                                                                   | Copy number gain | Copy number loss   | Chromosomal rearrangement                                                                     |
| 7    | 43~48, XY, +?Y, +?Y, <b>der(5)t(5;17)(q1?3;q11.2)</b> , -7, +8, -12, -13, <b>t(16;18)(q24;q23)</b> , +1~2mar [cp10]<br><br><b>der(5)t(5;17)(q1?3;q11.2)</b>                                                                                                                       |                  |                    | chr2/5/12/13/16/17/18 rearrangements                                                          |
|      | -7                                                                                                                                                                                                                                                                                |                  | 7                  |                                                                                               |
|      | +8                                                                                                                                                                                                                                                                                | 8                |                    |                                                                                               |
|      | -12                                                                                                                                                                                                                                                                               |                  |                    | 12p13.2-p12.1 (ETV6), chr2/5/12/13/16/17/18 rearrangements<br>12p12.1-p11.21,<br>12q12-q24.13 |
|      | <b>t(16;18)(q24;q23)</b>                                                                                                                                                                                                                                                          |                  |                    | chr2/5/12/13/16/17/18 rearrangements                                                          |
| 8    | 42-45, X, der(X)t(X;3)(q28;q21), <b>der(1)t(1;17)(p35;q21)</b> , -3, -5, <b>add(8)(q13)</b> , -9, add(11)(q13), add(12)(q24), <b>i(13)(q10)</b> , <b>del(16)(q23)</b> , -17, -18, -19, <b>+idic(22)(p12)</b> , +2r, +mar1 [cp9] / 46, XX [1]<br><br><b>der(1)t(1;17)(p35;q21)</b> |                  |                    | chr1/5/8/9/11/12/16/17/19 rearrangements                                                      |
|      | -3                                                                                                                                                                                                                                                                                |                  | 3                  |                                                                                               |
|      | <b>add(8)(q13)</b>                                                                                                                                                                                                                                                                | 8q (MYC)         |                    | chr1/5/8/9/11/12/16/17/19 rearrangements                                                      |
|      | <b>i(13)(q10)</b>                                                                                                                                                                                                                                                                 | 13               |                    |                                                                                               |
|      | <b>del(16)(q23)</b>                                                                                                                                                                                                                                                               |                  | 16q21-q24.3 (CTCF) | chr1/5/8/9/11/12/16/17/19 rearrangements                                                      |
|      | <b>+idic(22)(p12)</b>                                                                                                                                                                                                                                                             | 22               |                    |                                                                                               |
| 9    | 46, XX, <b>t(1;14)(q21;q11.2)</b> [20]<br><br><b>t(1;14)(q21;q11.2)</b>                                                                                                                                                                                                           |                  |                    | <b>t(1;14)(q23.2;q12)</b> linked to truncation of ATP1A2                                      |



**Supplementary Table 4. Cross-analysis of WGS and RNA-seq findings for gene fusion detection**

| Case | WGS      |           |             |           |           |              |           |            |                  | RNA-seq   |           |             |           |           |              |           |            |                 | Description                                              | Driver gene fusion                                     |                                                                                 |  |
|------|----------|-----------|-------------|-----------|-----------|--------------|-----------|------------|------------------|-----------|-----------|-------------|-----------|-----------|--------------|-----------|------------|-----------------|----------------------------------------------------------|--------------------------------------------------------|---------------------------------------------------------------------------------|--|
|      | Left chr | Left pos  | Left strand | Right chr | Right pos | Right strand | Left gene | Right gene | Gene orientation | Left chr  | Left pos  | Left strand | Right chr | Right pos | Right strand | Left gene | Right gene | Junction read # | Spanning fragment #                                      |                                                        |                                                                                 |  |
| 2    | chr3     | 17738725  | -           | chr15     | 34634338  | +            | TBC1D5    | NOP10      | Opposite         | chr3      | 17783973  | -           | chr15     | 34640170  | +            | TBC1D5    | NUTM1      | 28              | 109                                                      | Out-of-frame; 5' UTR of <i>TBC1D5</i>                  |                                                                                 |  |
|      | chrX     | 40023570  | -           | chrX      | 39523885  | +            | BCOR      |            |                  |           |           |             |           |           |              |           |            |                 |                                                          | #3 in Supp. Fig. 1; linked to <i>BCOR-RNF139</i> below |                                                                                 |  |
|      | chrX     | 39524250  | +           | chr8      | 125414839 | +            |           |            |                  |           |           |             |           |           |              |           |            |                 |                                                          | #2 in Supp. Fig. 1; linked to <i>BCOR-RNF139</i> below |                                                                                 |  |
|      |          |           |             |           |           |              |           |            |                  | chrX      | 40036260  | -           | chr8      | 125498072 | +            | BCOR      | RNF139     | 4               | 2                                                        | Out-of-frame; 5' UTR of <i>BCOR</i>                    |                                                                                 |  |
| 3    | chr20    | 45972885  | -           | chr9      | 132665158 | -            | ZMYND8    | FNBP1      | Same             | chr20     | 45976600  | -           | chr9      | 132662826 | -            | ZMYND8    | FNBP1      | 88              | 210                                                      | Out-of-frame                                           |                                                                                 |  |
|      | chr12    | 12012826  | +           | chr3      | 168875442 | -            | ETV6      | MECOM      | Same             | chr12     | 12006495  | +           | chr3      | 168861620 | -            | ETV6      | MECOM      | 18              | 75                                                       | Out-of-frame                                           | Increased expression of <i>MECOM</i> from an alternative translation start site |  |
|      | chr5     | 66263319  | +           | chr1      | 235611175 | +            | MAST4     | TBCE       | Same             |           |           |             |           |           |              |           |            |                 |                                                          | Out-of-frame                                           |                                                                                 |  |
|      | chr16    | 57065493  | +           | chr19     | 2275316   | -            | NLRC5     | C19orf35   | Same             |           |           |             |           |           |              |           |            |                 |                                                          |                                                        | 3' UTR of <i>C19orf35</i>                                                       |  |
|      | chr17    | 35936207  | +           | chr17     | 30854871  | +            | SYNRG     | MYO1D      | Same             |           |           |             |           |           |              |           |            |                 |                                                          |                                                        | Out-of-frame                                                                    |  |
|      | chr7     | 138769597 | -           | chr7      | 139432554 | -            | HIPK2     | ZC3HAV1    | Same             | chr7      | 138774370 | -           | chr7      | 139416814 | -            | ZC3HAV1   | HIPK2      | 26              | 48                                                       | Out-of-frame                                           |                                                                                 |  |
|      | chr17    | 56794315  | -           | chr17     | 57090343  | +            | RAD51C    | TRIM37     | Same             |           |           |             |           |           |              |           |            |                 |                                                          |                                                        | Out-of-frame; <i>TRIM37</i> is massively rearranged                             |  |
|      | chr17    | 57018384  | +           | chr17     | 57102178  | -            | PPM1E     | TRIM37     | Same             |           |           |             |           |           |              |           |            |                 |                                                          |                                                        | Out-of-frame; <i>TRIM37</i> is massively rearranged                             |  |
|      | chr7     | 138565338 | +           | chr4      | 151196527 | +            | KIAA1549  | LRBA       | Same             |           |           |             |           |           |              |           |            |                 |                                                          |                                                        | In-frame; <i>LRBA</i> is massively rearranged; no fusion transcript             |  |
|      |          |           |             |           |           |              |           |            |                  | chr4      | 151814204 | -           | chr7      | 138768778 | -            | LRBA      | ZC3HAV1    | 20              | 54                                                       | Out-of-frame                                           |                                                                                 |  |
|      |          |           |             |           |           |              |           |            | chr7             | 139313699 | -         | chr4        | 151719294 | -         | HIPK2        | LRBA      | 18         | 62              | Out-of-frame                                             |                                                        |                                                                                 |  |
|      |          |           |             |           |           |              |           |            | chr7             | 139030367 | +         | chr4        | 151186964 | -         | LUC7L2       | LRBA      | 7          | 43              | Out-of-frame                                             |                                                        |                                                                                 |  |
|      | chr16    | 80782     | -           | chr12     | 10531157  | -            | IL9RP3    | KLRK1      | Same             | chr16     | 81799     | -           | chr12     | 10530834  | -            | IL9RP3    | KLRK1      | 3               | 2                                                        | In-frame; <i>IL9RP3</i> is a pseudogene                |                                                                                 |  |
| 4    | chr11    | 3753668   | -           | chr12     | 404641    | +            | NUP98     | KDM5A      | Same             | chr11     | 3756421   | -           | chr12     | 402335    | -            | NUP98     | KDM5A      | 44              | 78                                                       | In-frame                                               | Yes                                                                             |  |
| 5    | chr11    | 85680853  | -           | chr10     | 21888265  | +            | PICALM    | MLLT10     | Same             | chr11     | 85685751  | -           | chr10     | 21901277  | +            | PICALM    | MLLT10     | 62              | 51                                                       | In-frame                                               | Yes                                                                             |  |
|      | chr10    | 21888246  | +           | chr11     | 85680578  | -            | MLLT10    | PICALM     | Same             | chr10     | 21884369  | +           | chr11     | 85670103  | -            | MLLT10    | PICALM     | 23              | 99                                                       | In-frame                                               |                                                                                 |  |
| 6    | chr11    | 3759564   | -           | chr17     | 65941452  | +            | NUP98     | BPTF       | Same             | chr11     | 3765739   | -           | chr17     | 65941525  | +            | NUP98     | BPTF       | 28              | 22                                                       | In-frame                                               | Yes                                                                             |  |
|      | chr17    | 65941478  | +           | chr11     | 3758816   | -            | BPTF      | NUP98      | Same             | chr17     | 65940488  | +           | chr11     | 3756554   | -            | BPTF      | NUP98      | 7               | 46                                                       | In-frame                                               |                                                                                 |  |
|      | chr6     | 108833664 | +           | chr6      | 108890015 | +            | LACE1     | FOXO3      | Same             |           |           |             |           |           |              |           |            |                 |                                                          |                                                        | In-frame; no fusion transcript; low expression of <i>LACE1</i>                  |  |
| 7    | chr13    | 21382331  | -           | chr8      | 41470742  | +            | XPO4      | AGPAT6     | Same             |           |           |             |           |           |              |           |            |                 |                                                          | Out-of-frame                                           |                                                                                 |  |
|      | chr16    | 68808494  | +           | chr12     | 111922848 | -            | CDH1      | ATXN2      | Same             |           |           |             |           |           |              |           |            |                 |                                                          |                                                        | In-frame; no fusion transcript; no expression of <i>CDH1</i>                    |  |
|      | chr17    | 36953437  | +           | chr17     | 36710058  | -            | PIP4K2B   | SRCIN1     | Same             |           |           |             |           |           |              |           |            |                 |                                                          |                                                        | Out-of-frame                                                                    |  |
|      | chr1     | 22453096  | +           | chr1      | 28159637  | +            | WNT4      | PPP1R8     | Same             |           |           |             |           |           |              |           |            |                 |                                                          |                                                        | Out-of-frame                                                                    |  |
|      | chr2     | 86740965  | -           | chr18     | 75954665  | +            | CHMP3     |            |                  |           |           |             |           |           |              |           |            |                 |                                                          |                                                        | Linked to <i>CHMP3-CDH3</i> below                                               |  |
|      | chr18    | 75966176  | +           | chr16     | 68756154  | +            |           | CDH3       |                  |           |           |             |           |           |              |           |            |                 |                                                          |                                                        | Linked to <i>CHMP3-CDH3</i> below                                               |  |
|      |          |           |             |           |           |              |           |            | chr2             | 86756341  | -         | chr16       | 68756328  | +         | CHMP3        | CDH3      | 51         | 114             | In-frame; putative alternative transcript of <i>CDH3</i> |                                                        |                                                                                 |  |
|      | chr7     | 157134847 | +           | chr7      | 71504707  | -            | CALN1     | DNAJB6     | Same             | chr7      | 157129838 | +           | chr7      | 71488754  | -            | DNAJB6    | CALN1      | 12              | 42                                                       | Inversion; out-of-frame; 5' UTR of <i>DNAJB6</i>       |                                                                                 |  |
| 8    | chr9     | 115804777 | +           | chr1      | 19501815  | +            | ZFP37     | UBR4       | Same             |           |           |             |           |           |              |           |            |                 |                                                          |                                                        | 3' UTR of <i>ZFP37</i>                                                          |  |
|      | chr8     | 40573882  | -           | chr12     | 27101439  | +            | ZMAT4     | FGFR1OP2   | Same             |           |           |             |           |           |              |           |            |                 |                                                          |                                                        | Out-of-frame; 5' UTR of <i>FGFR1OP2</i>                                         |  |
|      | chr11    | 120815777 | +           | chr11     | 121009286 | +            | GRIK4     | TECTA      | Same             |           |           |             |           |           |              |           |            |                 |                                                          |                                                        | In-frame; no fusion transcript; no expression of both genes                     |  |
|      | chr16    | 89500468  | -           | chr17     | 28688888  | +            | ANKRD11   |            |                  | chr16     | 89556653  | -           | chr17     | 28712007  | +            | ANKRD11   | CPD        | 3               | 3                                                        | Out-of-frame; 5' UTR of <i>ANKRD11</i>                 |                                                                                 |  |

**Supplementary Table 5.** Literature review of three cases with *NUP98-BPTF* fusion

| Case               | 1                                                                                                                                                                                                | 2                                      | 3                                                                           |
|--------------------|--------------------------------------------------------------------------------------------------------------------------------------------------------------------------------------------------|----------------------------------------|-----------------------------------------------------------------------------|
| Reference          | Yasuda <i>et al.</i> , 2016                                                                                                                                                                      | Roussy <i>et al.</i> , 2018            | This study (#6)                                                             |
| Sex                | Female                                                                                                                                                                                           | Male                                   | Female                                                                      |
| Age                | 19 years                                                                                                                                                                                         | 8 months                               | 20 years                                                                    |
| Diagnosis          | T-cell acute lymphoblastic leukemia                                                                                                                                                              | Acute megakaryoblastic leukemia        | Acute myeloid leukemia                                                      |
| Karyotype          | 86~89, XXXX, +X, add(1)(p36), -4, -5, -6, ?add(6)(q21), -7, -8, -9, -10, -11, der(11)add(11)(p11)add(11)(q23), -13, -14, -15, -16, -17, -18, -18, -20, -21, +11, ~15mar, inc [cp5] / 46, XX [14] | 49, XY, +6, +7, t(11;17)(p15;q23), +19 | 46, XX, del(5)(q31), t(11;12)(p13;p13) [4] / 45, idem, -13 [5] / 46, XX [1] |
| <i>NUP98</i> exons | Not available                                                                                                                                                                                    | 1-11                                   | 1-12                                                                        |
| <i>BPTF</i> exons  | Not available                                                                                                                                                                                    | 26-30*                                 | 23-30*                                                                      |

*NUP98* exons are derived from Refseq transcript NM\_016320, and *BPTF* exons are derived from Refseq transcript NM\_004459. \*An additional 174-bp exon is included between exons 26 and 27 at chr17:65,959,449-65,959,622 (ref. 11).

**Supplementary Table 6.** Immunophenotype of case 5 at diagnosis and progression

|                                   | Diagnosis | Progression |
|-----------------------------------|-----------|-------------|
| Myelomonocytic associated markers |           |             |
| CD11b                             | 0.32      | 0.42        |
| CD13                              | 0.57      | 0.45        |
| CD15                              | 0.02      | 0.01        |
| CD33                              | 0.08      | 0.45        |
| CD34                              | 0.38      | 0.51        |
| CD56                              | <0.01     | 0.02        |
| CD65                              | 0.03      | 0.01        |
| CD117                             | 0.01      | 0.30        |
| HLA-DR                            | 0.92      | 0.91        |
| CD33+CD34+                        | 0.06      | 0.40        |
| Lymphoid markers                  |           |             |
| CD2                               | 0.04      | 0.03        |
| CD3                               | 0.01      | <0.01       |
| CD4+CD3+                          | <0.01     | NA          |
| CD4                               | NA        | 0.03        |
| CD5                               | 0.05      | NA          |
| CD7                               | >0.99     | 0.98        |
| CD8+CD3+                          | <0.01     | NA          |
| CD10                              | 0.01      | <0.01       |
| CD19                              | 0.06      | 0.17        |
| Intracellular markers             |           |             |
| TdT                               | 0.01      | 0.01        |
| MPO                               | <0.01     | <0.01       |
| CyCD3                             | 0.01      | 0.02        |
| CyCD79a                           | 0.61      | 0.43        |
| CyCD22                            | 0.02      | NA          |

Blasts are gated on CD45 versus side scatter. Blast region contains ~86% of gated cells at diagnosis and ~55% at relapse.
